# Supplementary material for: Potential anion sensing properties by a redox and substitution series of [Ru(bpy)3−n(Hdpa)n]2+, n = 1–3; Hdpa = 2,2′-dipyridylamine: selective recognition and stoichiometric binding with cyanide and fluoride ions
Source: Royal Society of Chemistry journal article supplement (doi:10.1039/c6ra09566f), 2016-01-01
Supplement: c6ra09566f1.pdf [file c6ra09566f1.pdf]

## **Electronic Supplementary Information**

**Potential anion sensing properties by a redox and substitution series of  $[\text{Ru}(\text{bpy})_{3-n}(\text{Hdpa})_n]^{2+}$ ,  $n = 1-3$ ; Hdpa = 2,2'-Dipyridylamine: selective recognition and stoichiometric binding with cyanide and fluoride ions**

**Sagar K. Patil,<sup>a</sup> Rajib Ghosh,<sup>b</sup> Princy Kennedy,<sup>a</sup> Shaikh M. Mobin<sup>c</sup> and Dipanwita Das<sup>\*a</sup>**

<sup>a</sup>Department of Chemistry, Institute of Chemical Technology, Matunga, Mumbai 400019

(India)

Fax: (91)022-3361-1020

E-mail: [dr.das@ictmumbai.edu.in](mailto:dr.das@ictmumbai.edu.in)

<sup>b</sup>Radiation and Photochemistry Division, Bhabha Atomic Research Centre, Mumbai-400094,

India

<sup>c</sup>Discipline of Chemistry, School of Basic Sciences, Indian Institute of Technology Indore,

Indore 452017, India

**Table S1** Crystallographic data for [Ru(bpy)(Hdpa)<sub>2</sub>](ClO<sub>4</sub>)<sub>2</sub> [**2**](ClO<sub>4</sub>)<sub>2</sub> and [Ru(bpy)<sub>2</sub>(dpa)](BF<sub>4</sub>) [**1**](BF<sub>4</sub>)

|                                                                                                                  | [ <b>2</b> ](ClO <sub>4</sub> ) <sub>2</sub>                                     | [ <b>1</b> ]BF <sub>4</sub>                                       |
|------------------------------------------------------------------------------------------------------------------|----------------------------------------------------------------------------------|-------------------------------------------------------------------|
| Formula                                                                                                          | C <sub>30</sub> H <sub>26</sub> Cl <sub>2</sub> N <sub>8</sub> O <sub>8</sub> Ru | C <sub>30</sub> H <sub>24</sub> BF <sub>4</sub> N <sub>7</sub> Ru |
| Fw                                                                                                               | 798.56                                                                           | 670.44                                                            |
| T(K)                                                                                                             | 293(2) K                                                                         | 293 (2) K                                                         |
| Cryst. Syst.                                                                                                     | Triclinic                                                                        | Trigonal                                                          |
| Space group                                                                                                      | <i>P</i> -1                                                                      | <i>P</i> 3221                                                     |
| <i>a</i> /Å                                                                                                      | 8.1459(5)                                                                        | 13.0588(3)                                                        |
| <i>b</i> /Å                                                                                                      | 10.9387(5)                                                                       | 13.0588(3)                                                        |
| <i>c</i> /Å                                                                                                      | 17.8507(9)                                                                       | 31.5888(11)                                                       |
| $\alpha$ (°)                                                                                                     | 88.824(4)                                                                        | 90                                                                |
| $\beta$ (°)                                                                                                      | 88.463(4)                                                                        | 90                                                                |
| $\gamma$ (°)                                                                                                     | 88.991(4)                                                                        | 120                                                               |
| <i>V</i> /Å <sup>3</sup>                                                                                         | 1589.46(15)                                                                      | 4665.2(3)                                                         |
| <i>D<sub>c</sub></i> (g cm <sup>-3</sup> )                                                                       | 1.669                                                                            | 1.432                                                             |
| <i>Z</i>                                                                                                         | 2                                                                                | 6                                                                 |
| $\mu$ (mm <sup>-1</sup> )                                                                                        | 0.727                                                                            | 0.559                                                             |
| <i>F</i> (000)                                                                                                   | 808                                                                              | 2028                                                              |
| $\theta$ range (deg)                                                                                             | 2.976- 24.997                                                                    | 3.120-24.994                                                      |
| Data/restraints/params                                                                                           | 5593/0/442                                                                       | 5487/482/433                                                      |
| GOF on <i>F</i> <sup>2</sup>                                                                                     | 1.166                                                                            | 1.108                                                             |
| <i>R</i> <sub>1</sub> <sup>a</sup> [ <i>I</i> > 2σ( <i>I</i> )], w <i>R</i> <sub>2</sub> <sup>b</sup> (all data) | 0.0903, 0.2689                                                                   | 0.0982, 0.2582                                                    |
| Largest diff. peak/ hole/ e Å <sup>-3</sup>                                                                      | 2.761/ -1.985                                                                    | 1.676/ -1.035                                                     |

**Table S2** Selected bond distances (Å) and bond angles (°) for [Ru(bpy)(Hdpa)<sub>2</sub>](ClO<sub>4</sub>)<sub>2</sub>,[2](ClO<sub>4</sub>)<sub>2</sub>

|                 | [2](ClO <sub>4</sub> ) <sub>2</sub> |
|-----------------|-------------------------------------|
| Ru(1)-N(2)      | 2.079(8)                            |
| Ru(1)-N(5)      | 2.085(8)                            |
| Ru(1)-N(3)      | 2.094(8)                            |
| Ru(1)-N(1)      | 2.095(8)                            |
| Ru(1)-N(8)      | 2.097(8)                            |
| Ru(1)-N(6)      | 2.100(8)                            |
| N(4)-H(4)       | 0.86                                |
| N(7)-H(7)       | 0.86                                |
| N(2)-Ru(1)-N(5) | 95.9(3)                             |
| N(2)-Ru(1)-N(3) | 85.8(3)                             |
| N(5)-Ru(1)-N(3) | 87.9(3)                             |
| N(2)-Ru(1)-N(1) | 79.2(3)                             |
| N(5)-Ru(1)-N(1) | 173.8(3)                            |
| N(3)-Ru(1)-N(1) | 88.0(3)                             |
| N(2)-Ru(1)-N(8) | 92.6(3)                             |
| N(5)-Ru(1)-N(8) | 94.2(3)                             |
| N(3)-Ru(1)-N(8) | 177.5(3)                            |
| N(1)-Ru(1)-N(8) | 89.8(3)                             |
| N(2)-Ru(1)-N(6) | 175.7(3)                            |
| N(5)-Ru(1)-N(6) | 88.2(3)                             |
| N(3)-Ru(1)-N(6) | 93.1(3)                             |
| N(1)-Ru(1)-N(6) | 96.6(3)                             |
| N(8)-Ru(1)-N(6) | 88.3(3)                             |

**Table S3** Selected bond distances (Å) and bond angles (°) for [Ru(bpy)<sub>2</sub>(dpa)](BF<sub>4</sub>), [1](BF<sub>4</sub>)

|                 | [1](BF <sub>4</sub> ) |
|-----------------|-----------------------|
| Ru(1)-N(2)      | 2.043(11)             |
| Ru(1)-N(3)      | 2.054(12)             |
| Ru(1)-N(4)      | 2.066(11)             |
| Ru(1)-N(1)      | 2.070(11)             |
| Ru(1)-N(6)      | 2.076(12)             |
| Ru(1)-N(5)      | 2.113(13)             |
| N(2)-Ru(1)-N(3) | 87.6(5)               |
| N(2)-Ru(1)-N(4) | 95.0(5)               |
| N(3)-Ru(1)-N(4) | 78.2(5)               |
| N(2)-Ru(1)-N(1) | 79.2(5)               |
| N(3)-Ru(1)-N(1) | 96.5(5)               |
| N(4)-Ru(1)-N(1) | 172.3(5)              |
| N(2)-Ru(1)-N(6) | 93.3(4)               |
| N(3)-Ru(1)-N(6) | 173.8(5)              |
| N(4)-Ru(1)-N(6) | 95.6(5)               |
| N(1)-Ru(1)-N(6) | 89.8(5)               |
| N(2)-Ru(1)-N(5) | 175.5(6)              |
| N(3)-Ru(1)-N(5) | 91.8(6)               |
| N(4)-Ru(1)-N(5) | 89.3(5)               |
| N(1)-Ru(1)-N(5) | 96.5(6)               |
| N(6)-Ru(1)-N(5) | 87.8(6)               |

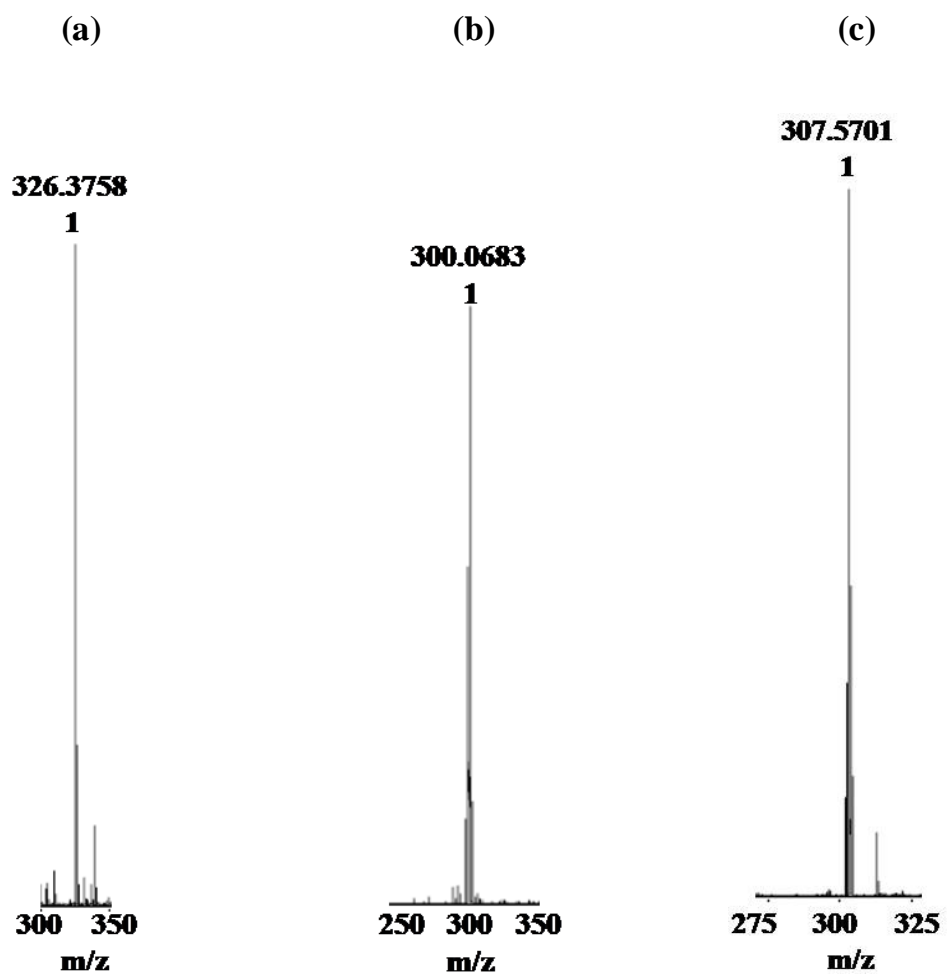

**Fig. S1** ESI-MS (positive) for  $[1](ClO_4)_2$  (a),  $[2](ClO_4)_2$  (b) and  $[3](ClO_4)_2$  (c).

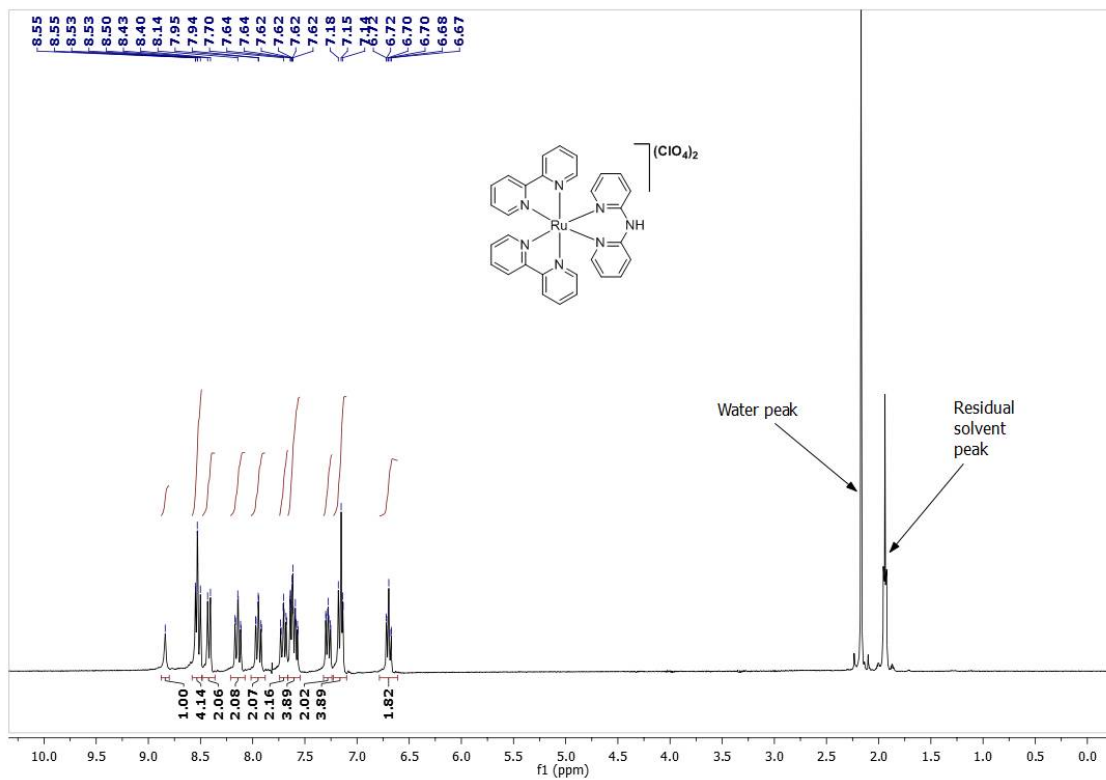

**Fig. S2**  $^1\text{H}$  NMR of receptor [1] $(\text{ClO}_4)_2$  in  $\text{CD}_3\text{CN}$ .

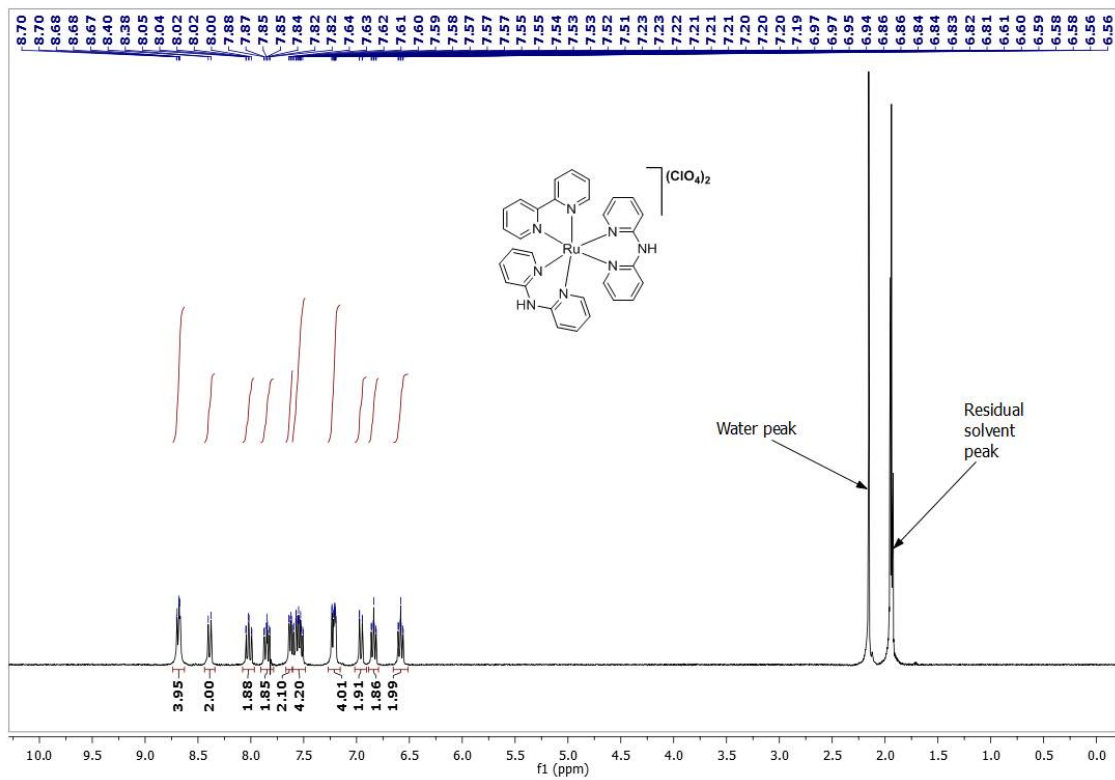

Fig. S3 <sup>1</sup>H NMR of receptor [2](ClO<sub>4</sub>)<sub>2</sub> in CD<sub>3</sub>CN.

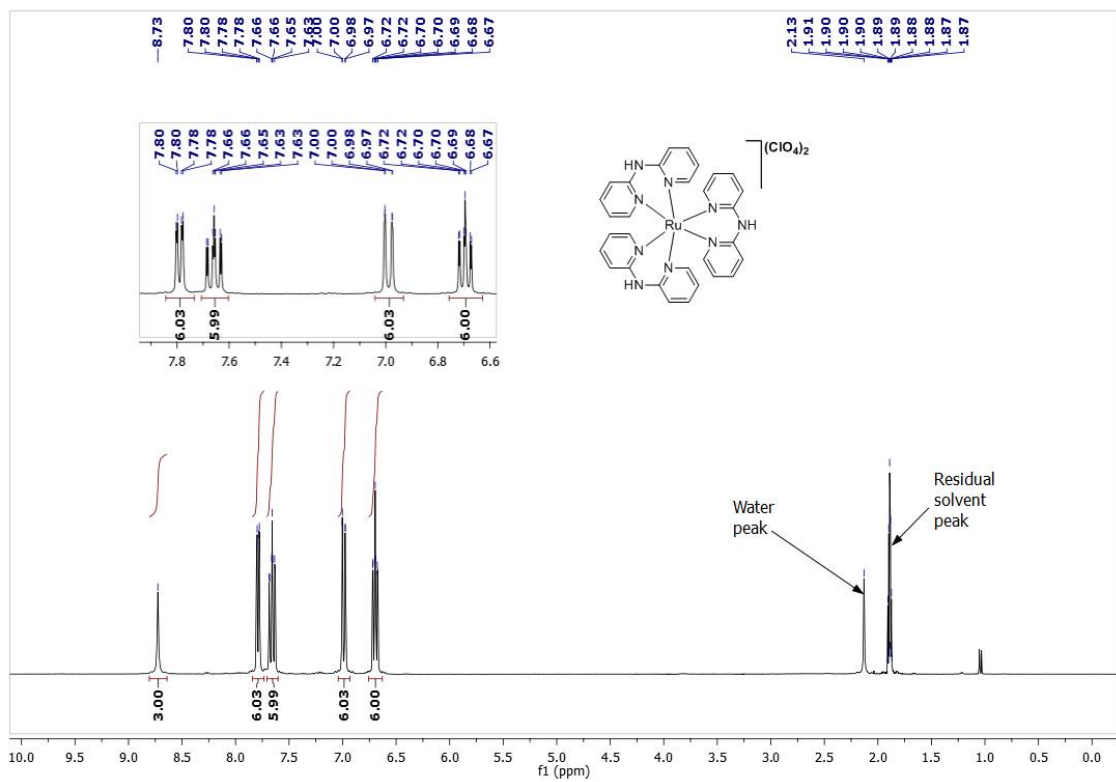

**Fig. S4**  $^1\text{H}$  NMR of receptor  $[3](\text{ClO}_4)_2$  in  $\text{CD}_3\text{CN}$ .



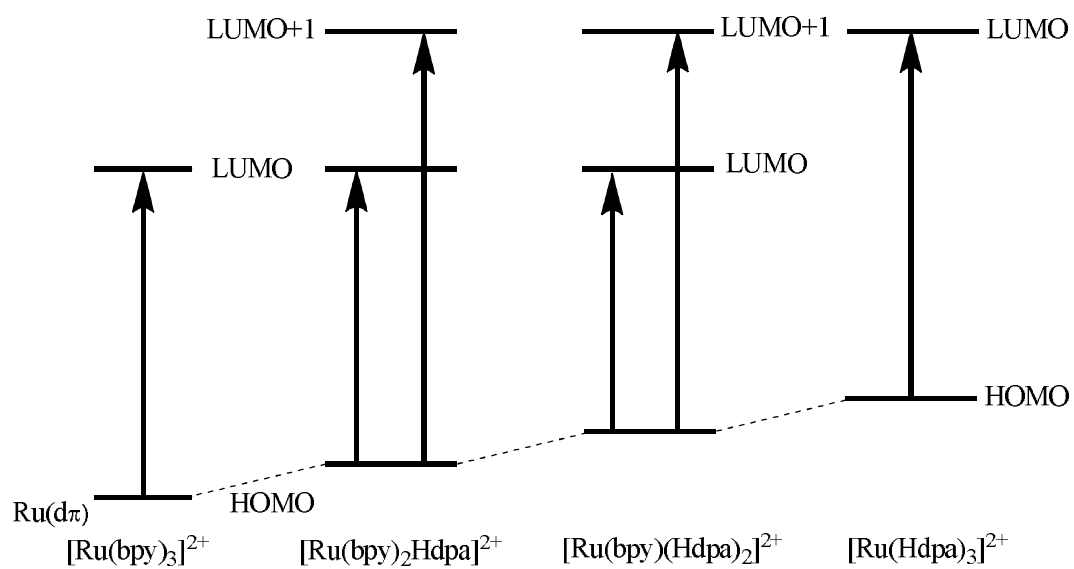

**Fig. S5** Qualitative schematic energy diagram for  $[\text{Ru}(\text{bpy})_{3-n}(\text{Hdpa})_n](\text{ClO}_4)_2$ , where  $n = 0-3$ .

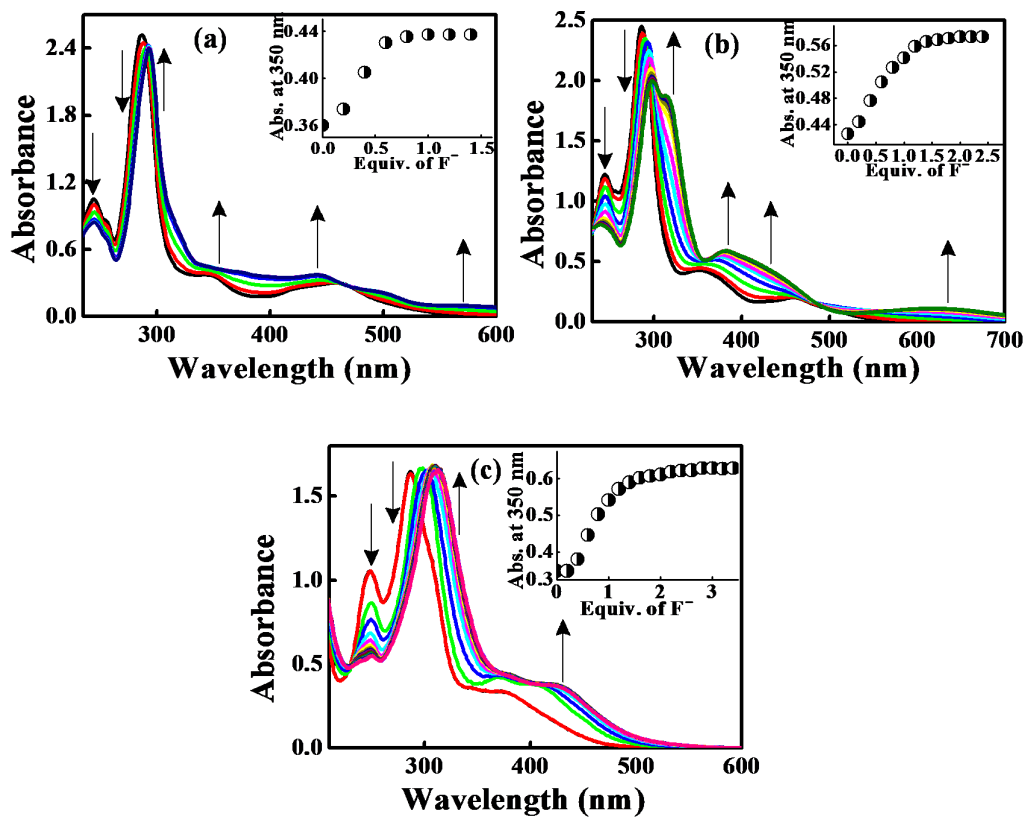

**Fig. S6** Changes in absorption spectra of receptor  $1^{2+}$  (a),  $2^{2+}$  (b) and  $3^{2+}$  (c) in CH<sub>3</sub>CN upon addition of F<sup>-</sup>. The inset shows the changes of absorbance as a function of the equivalents of F<sup>-</sup> added.

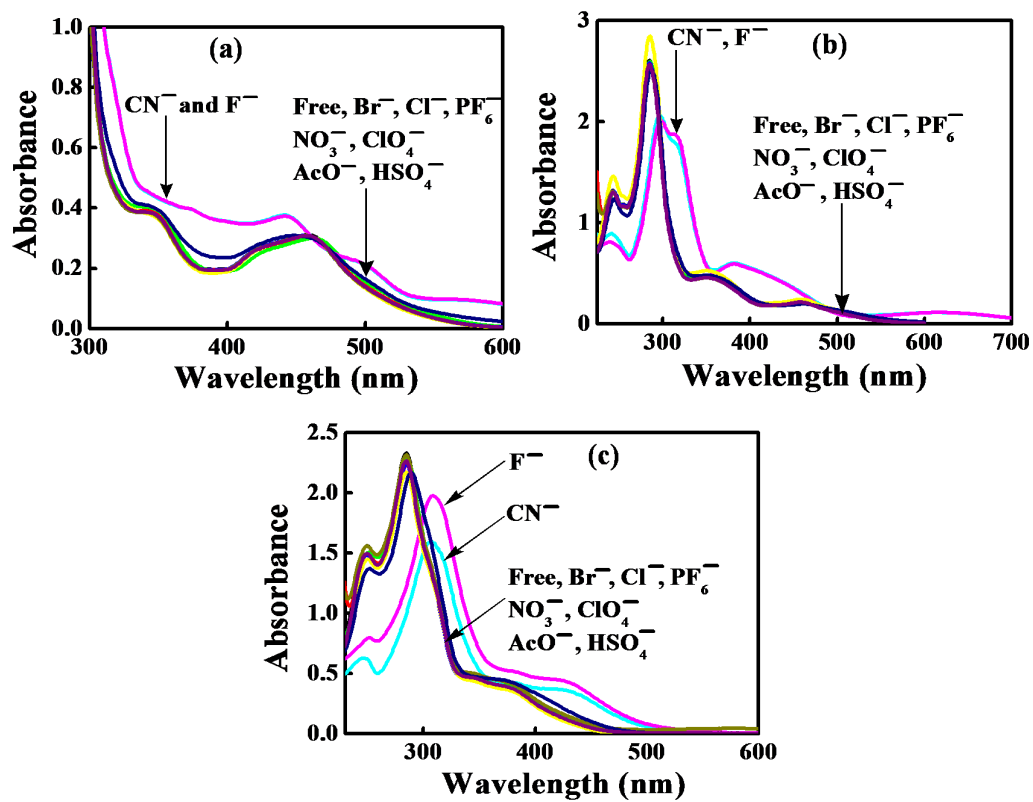

**Fig. S7** Changes in absorption spectra of receptor  $1^{2+}$  (a),  $2^{2+}$  (b) and  $3^{2+}$  (c) in  $\text{CH}_3\text{CN}$  in addition of different anions as their TBA-salts.

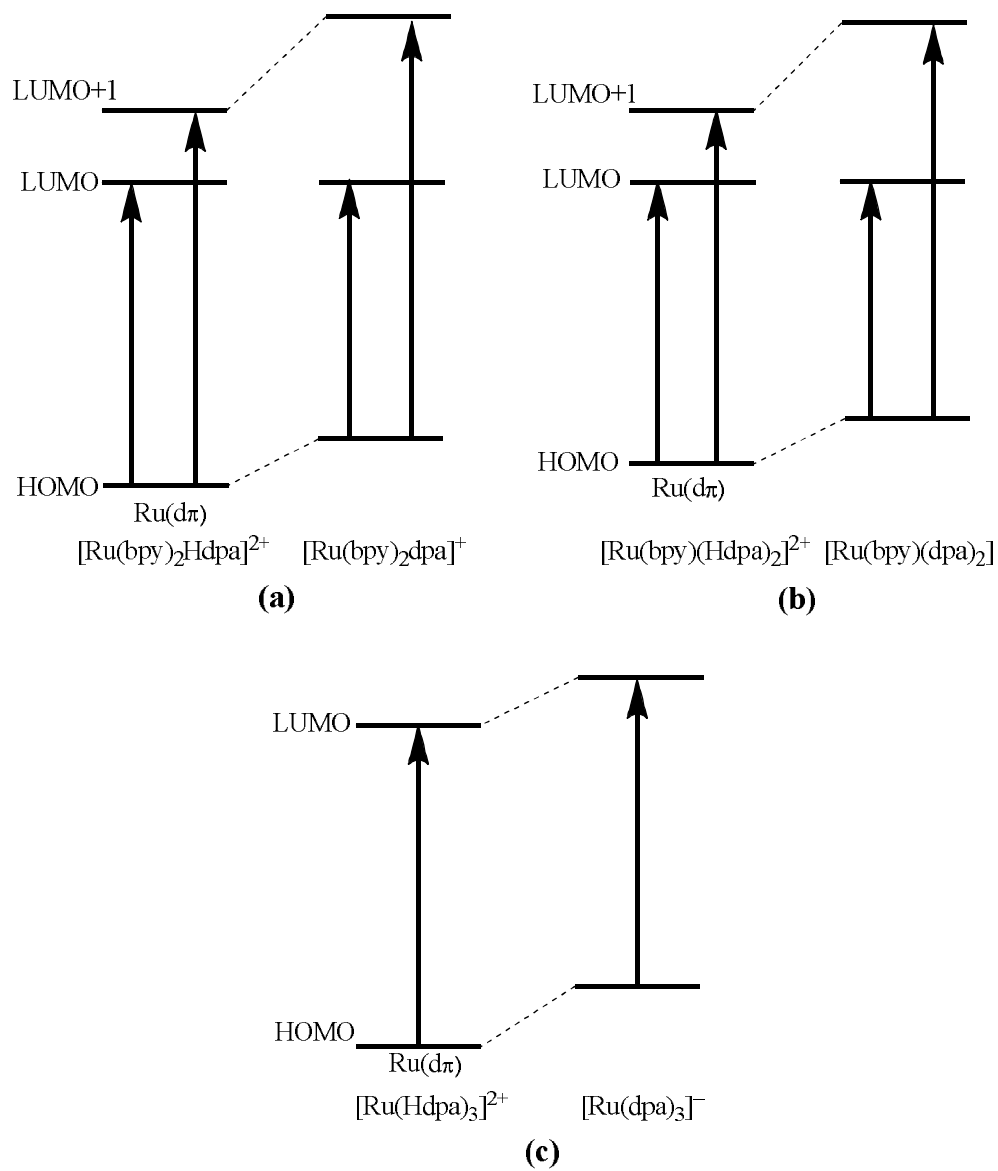

**Fig. S8** Qualitative energy diagram for  $[\text{Ru}(\text{bpy})_{3-n}(\text{Hdpa})_n](\text{ClO}_4)_2$ , where  $n = 1-3$ , with corresponding deprotonated complexes.

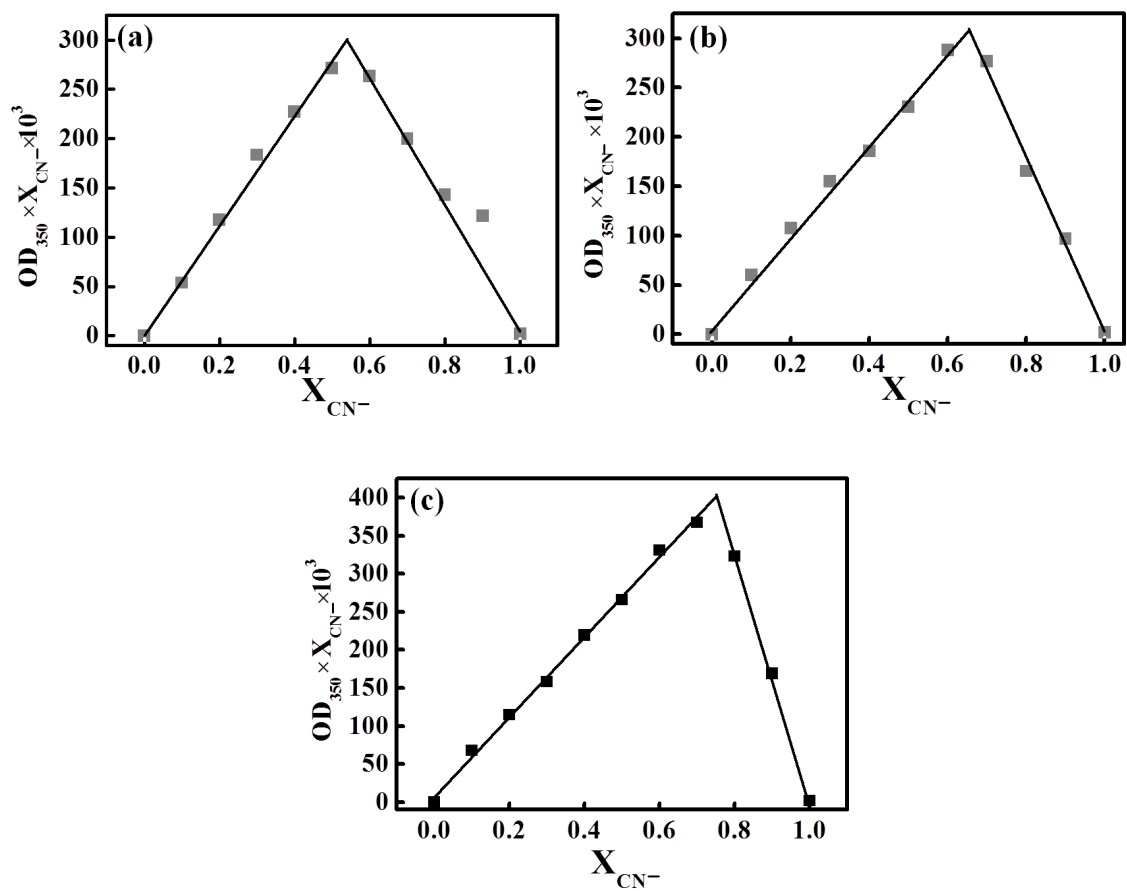

**Fig. S9** Job plots for the determination of the stoichiometry of  $1^{2+}$  (a),  $2^{2+}$  (b) and  $3^{2+}$  (c) with  $CN^-$  ion.

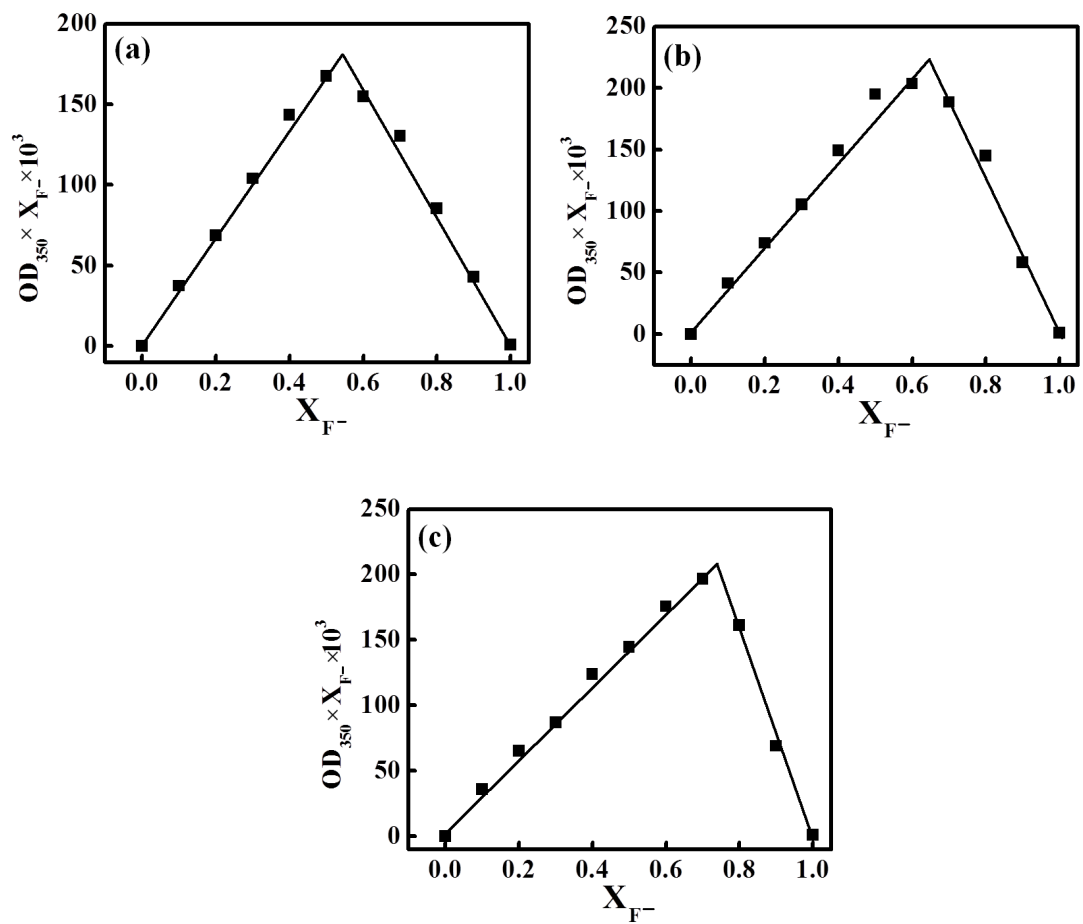

**Fig. S10** Job plots for the determination of the stoichiometry of  $1^{2+}$  (a),  $2^{2+}$  (b) and  $3^{2+}$  (c) with  $F^-$  ion.

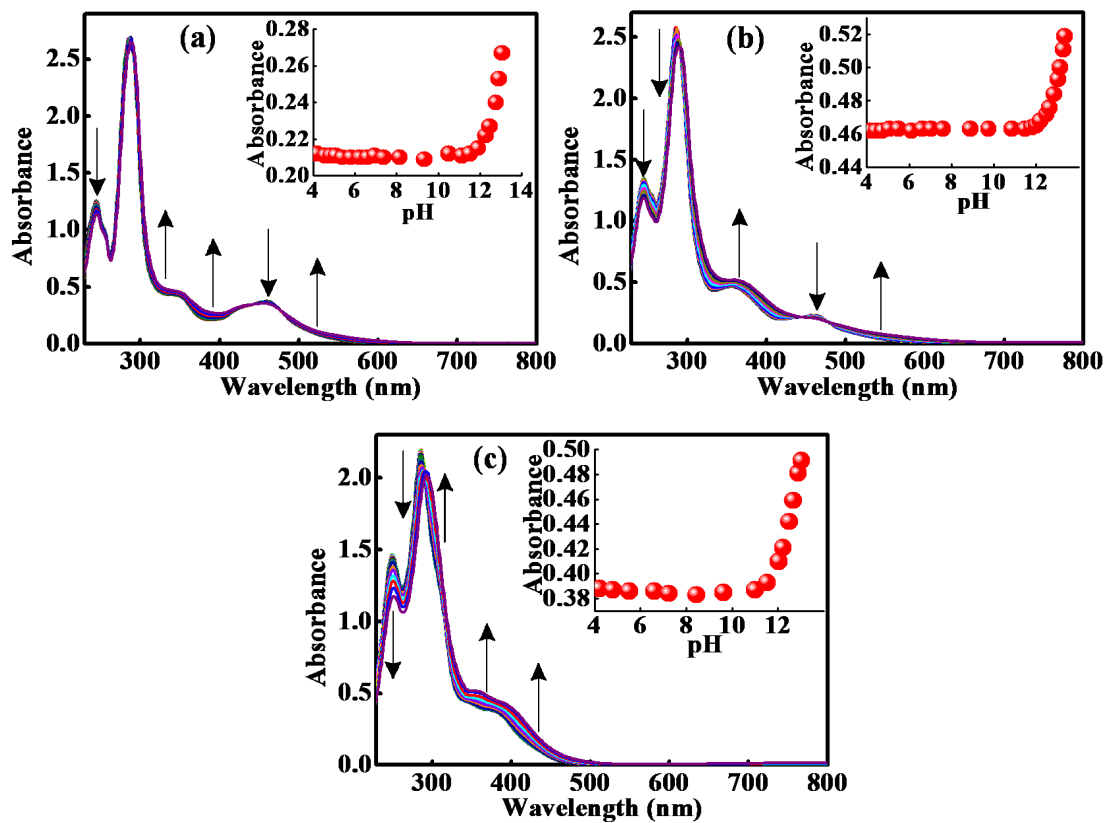

**Fig. S11** Absorption spectra of (a)  $1^{2+}$  (b)  $2^{2+}$  and (c)  $3^{2+}$  as a function of pH in Britton-

Robinson aqueous universal buffer solution. Insets show the changes in absorbance

at (a) 398 nm for  $1^{2+}$ , (b) 360 nm for  $2^{2+}$  (c) 368 nm for  $3^{2+}$  with the pH.

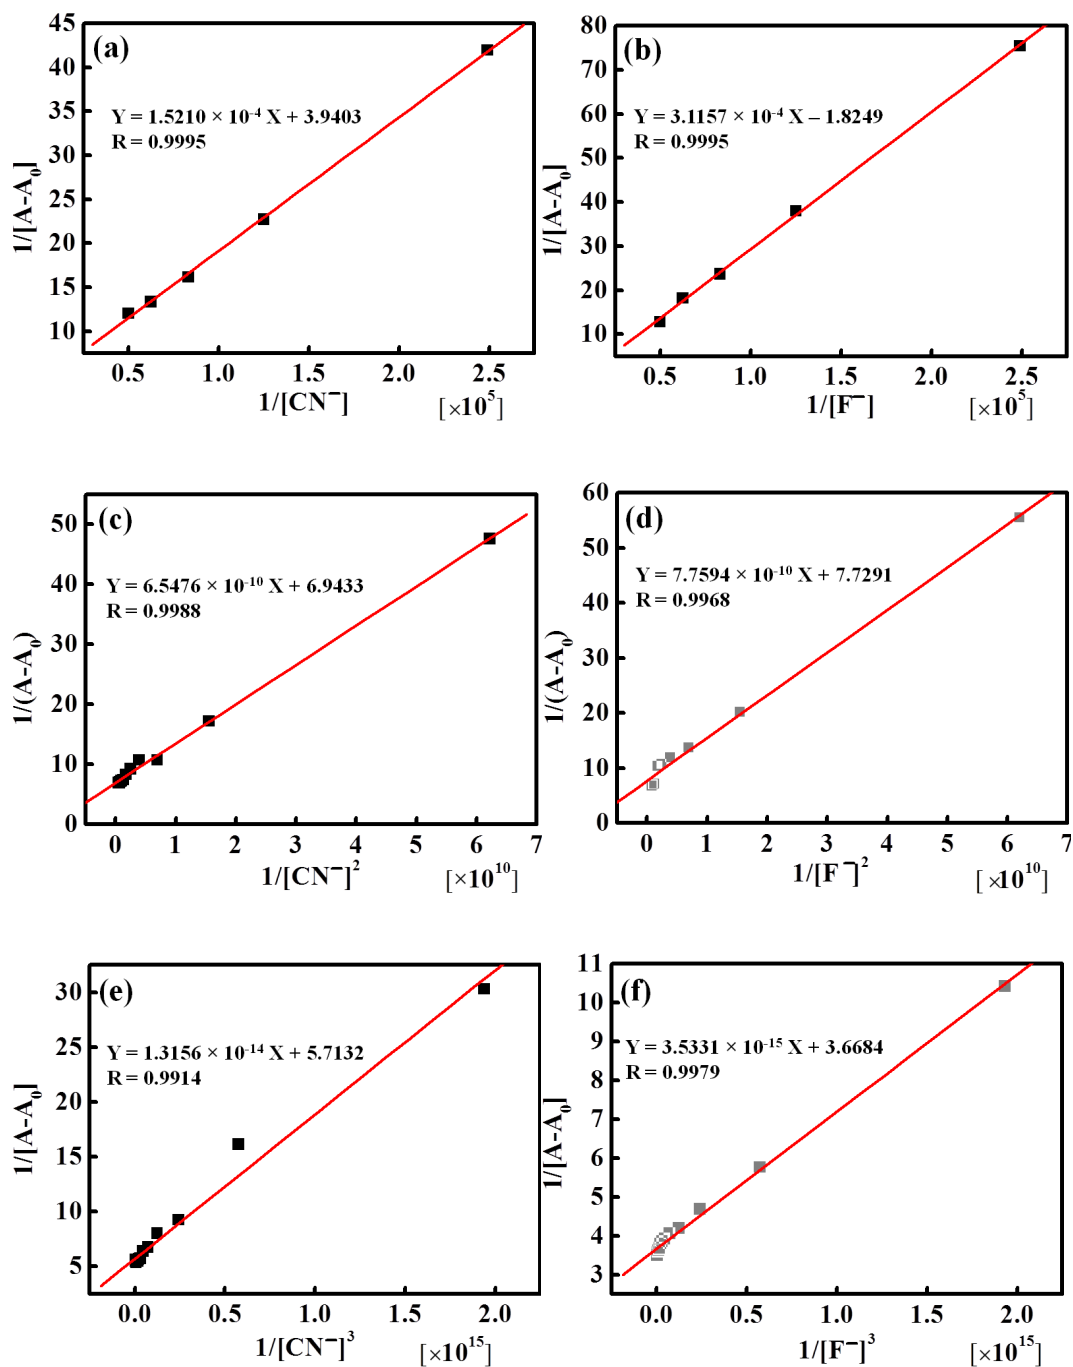

Fig. S12 Benesi-Hildebrand plots (a-f) of  $1^{2+}$ ,  $2^{2+}$  and  $3^{2+}$  with  $\text{CN}^-$  and  $\text{F}^-$ .



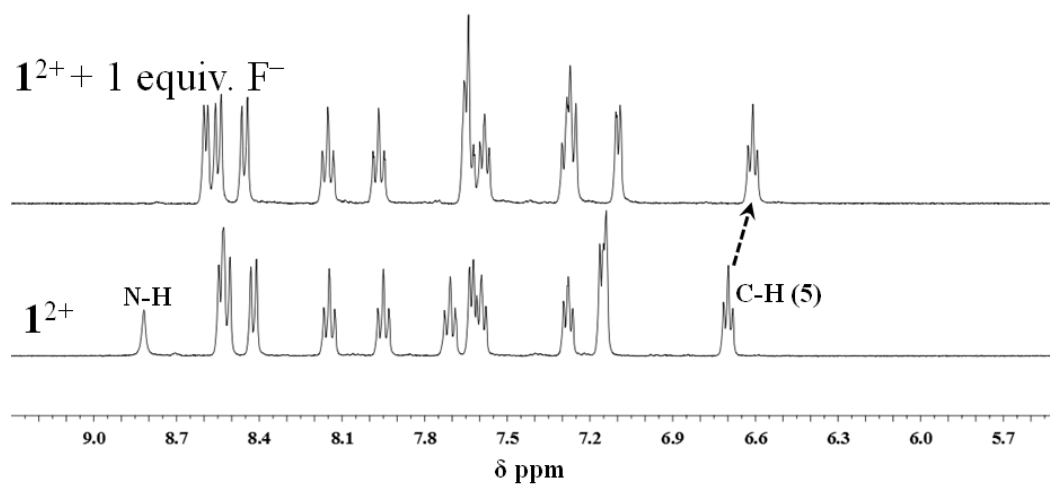

**Fig. S13**  $^1\text{H}$  NMR spectra of  $\mathbf{1}^{2+}$  in absence and presence of one equivalent of  $\text{F}^-$  in  $\text{CD}_3\text{CN}$ .

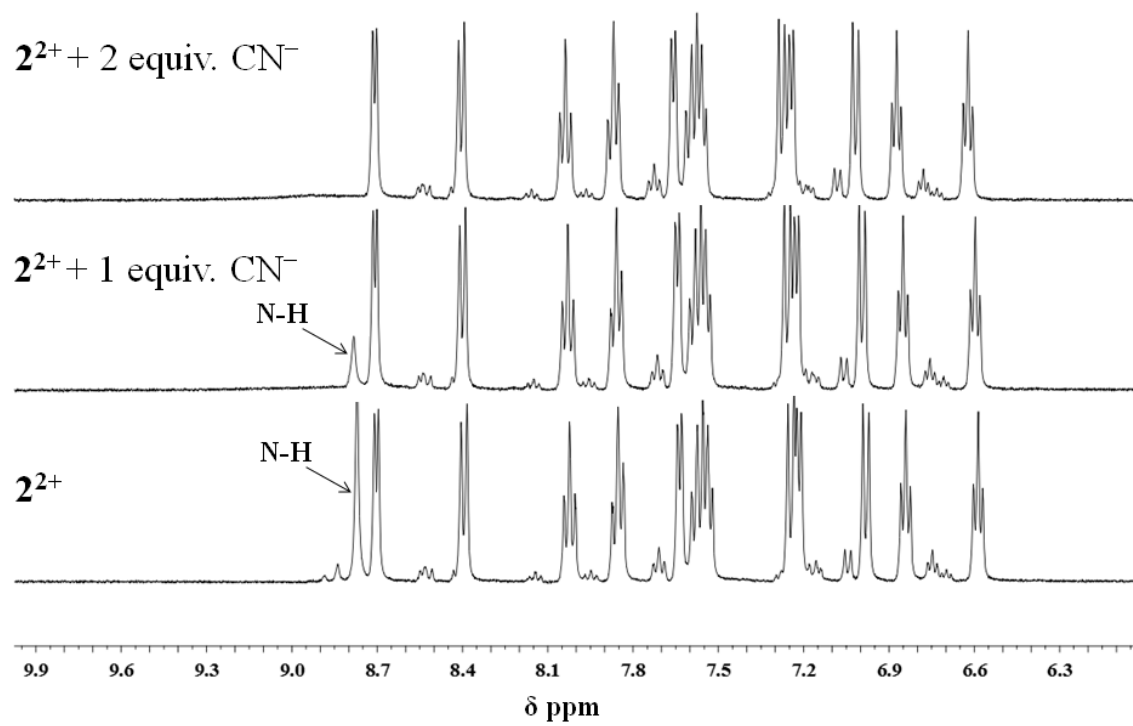

**Fig. S14**  $^1\text{H}$  NMR titration of  $2^{2+}$  in  $\text{CD}_3\text{CN}$  with the TBA salt of  $\text{CN}^-$  ion (0–2 equivalents).

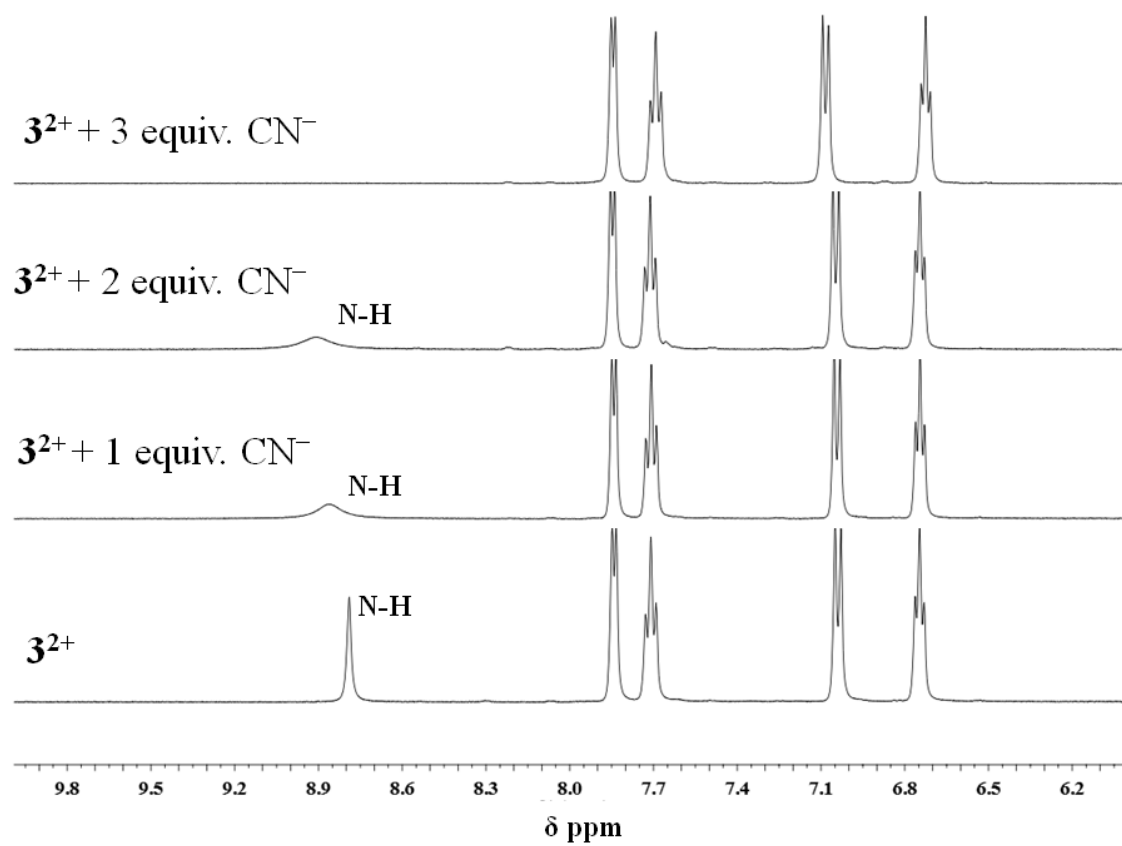

**Fig. S15**  $^1\text{H}$  NMR titration of  $3^{2+}$  in  $\text{CD}_3\text{CN}$  with the TBA salt of  $\text{CN}^-$  ion (0–3 equivalents).

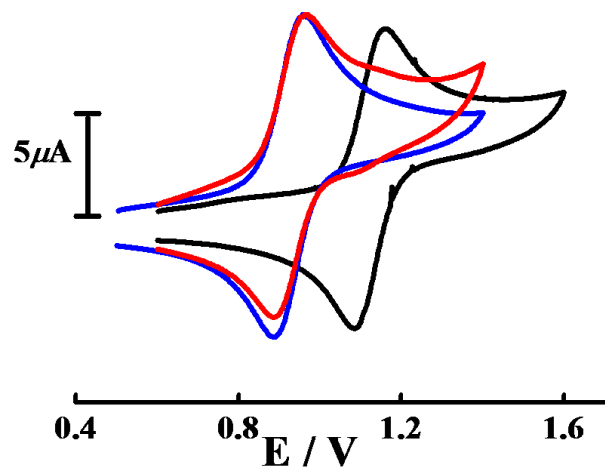

**Fig. S16** Cyclic voltammograms of  $1^{2+}$  (black),  $2^{2+}$  (red) and  $3^{2+}$  (blue) in  $\text{CH}_3\text{CN}$ .

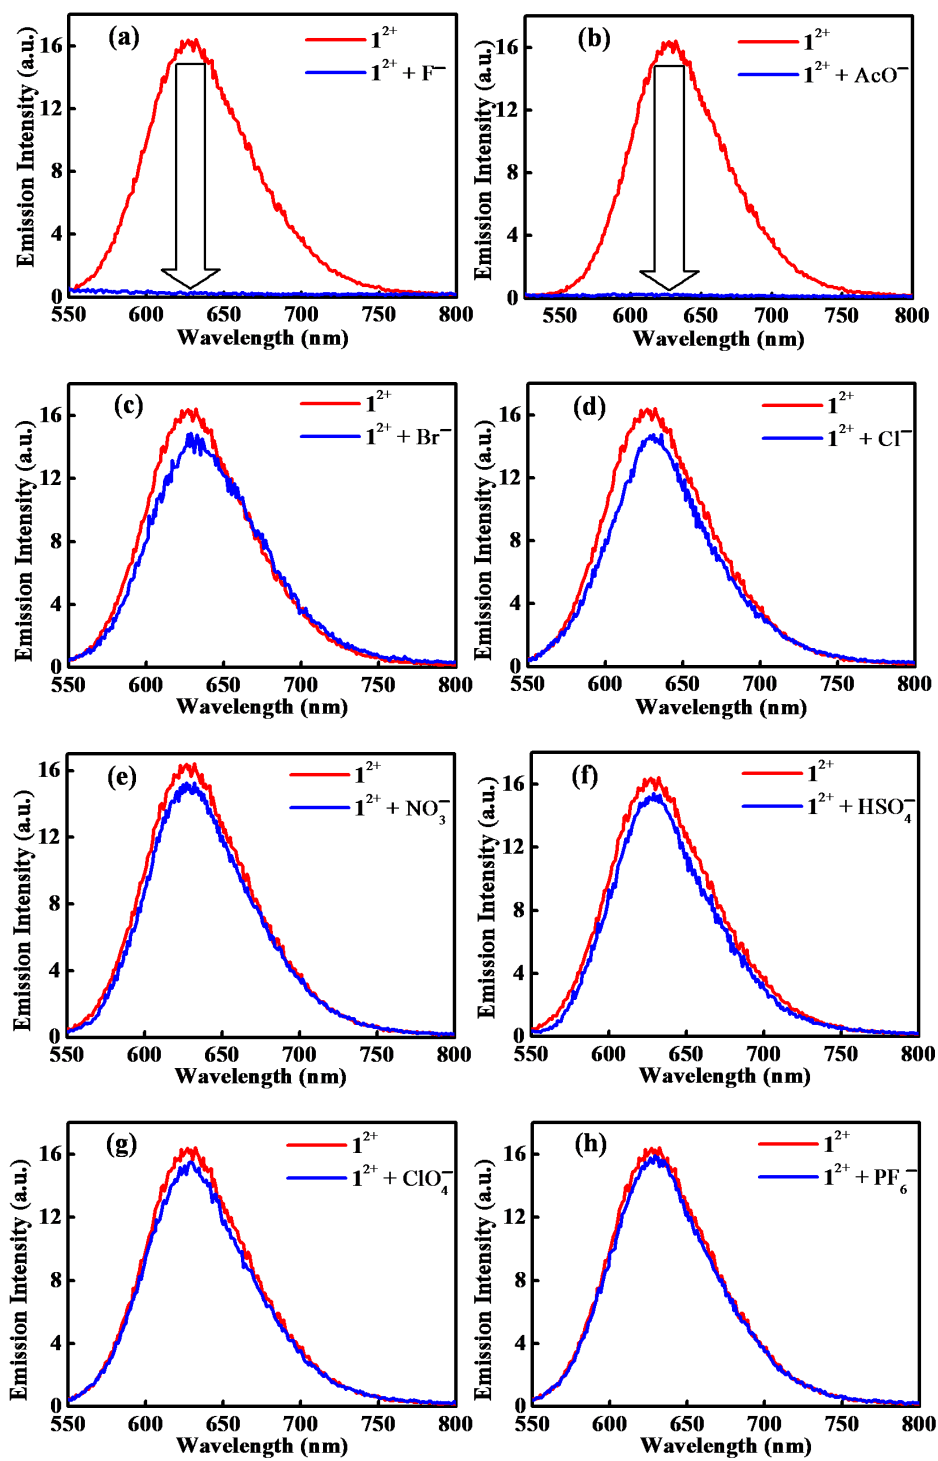

**Fig. S17** Changes in emission intensity of receptor  $1^{2+}$  upon addition of TBA-salts of different anions.

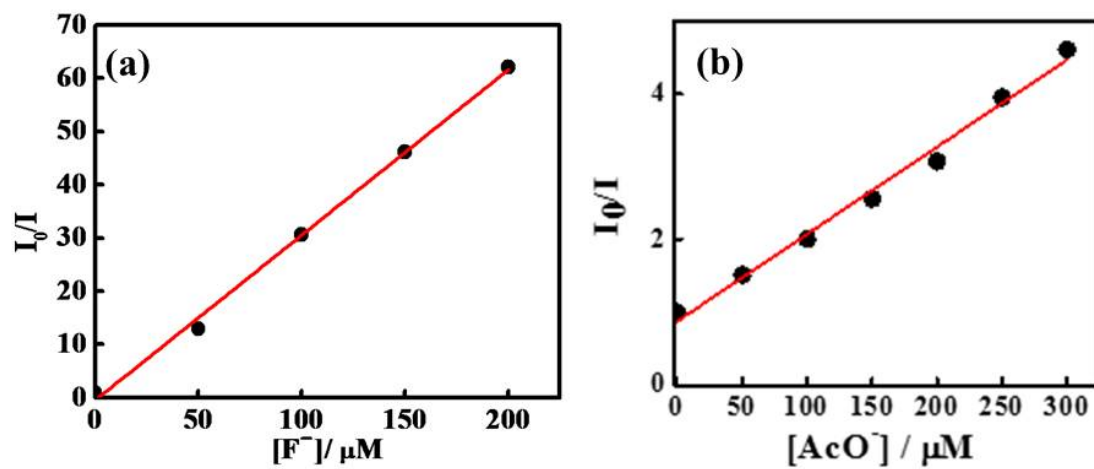

**Fig. S18** Stern-Volmer plots of [1](ClO<sub>4</sub>)<sub>2</sub> with F<sup>-</sup> (a) and AcO<sup>-</sup> (b).

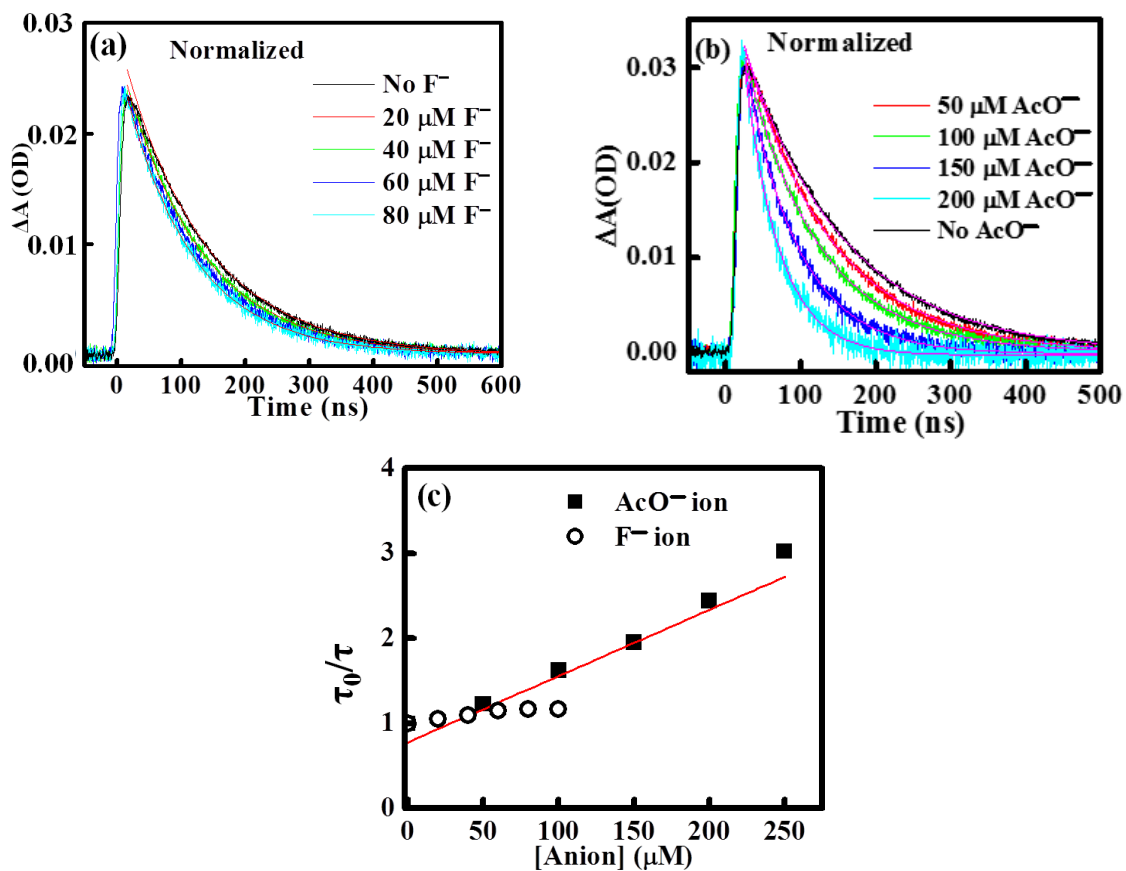

**Fig. S19** Emission kinetics (normalized at maxima) of complex [1](ClO<sub>4</sub>)<sub>2</sub> in presence of F<sup>-</sup> (a) and AcO<sup>-</sup> (b) ion. (c) Plot of  $\tau_0/\tau$  versus concentration of anions (F<sup>-</sup> and AcO<sup>-</sup>).

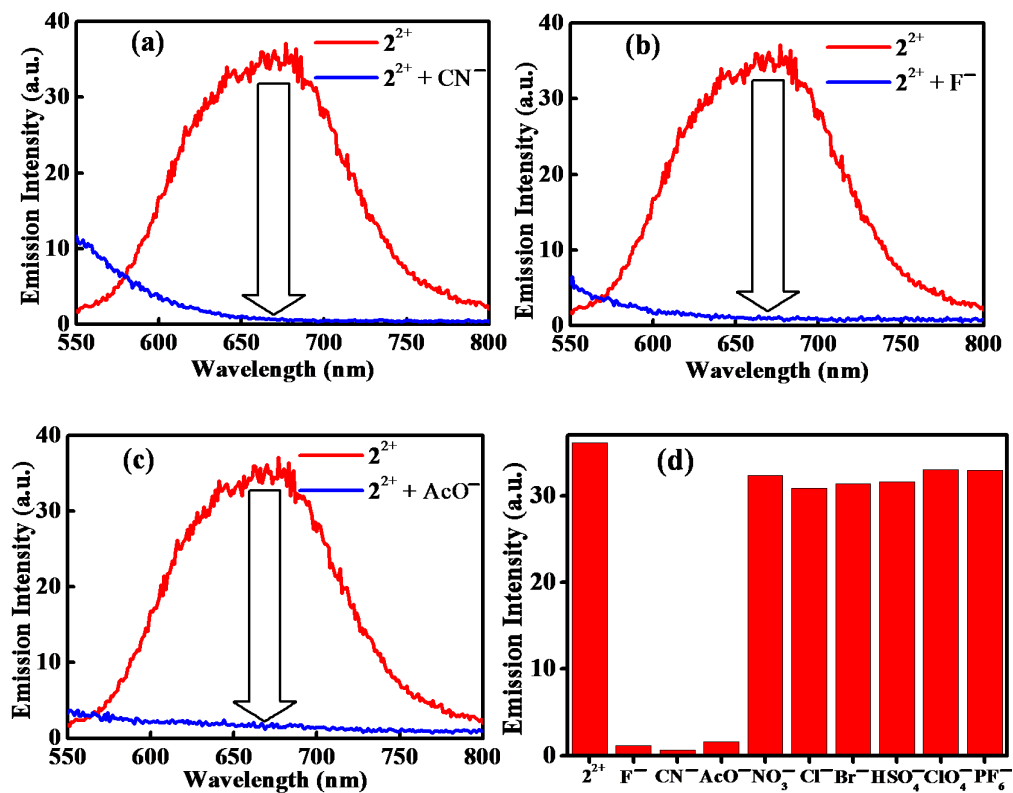

**Fig. S20** Emission spectra of receptor  $2^{2+}$  in  $CH_3CN$  solution in the presence and absence of  $CN^{-}$  (a),  $F^{-}$  (b) and  $AcO^{-}$  (c) anions. (d) Relative emission intensity of receptor  $2^{2+}$  upon addition of  $F^{-}$ ,  $CN^{-}$ ,  $AcO^{-}$ ,  $NO_3^{-}$ ,  $Cl^{-}$ ,  $Br^{-}$ ,  $HSO_4^{-}$ ,  $ClO_4^{-}$  and  $PF_6^{-}$  ions in  $CH_3CN$  solution.



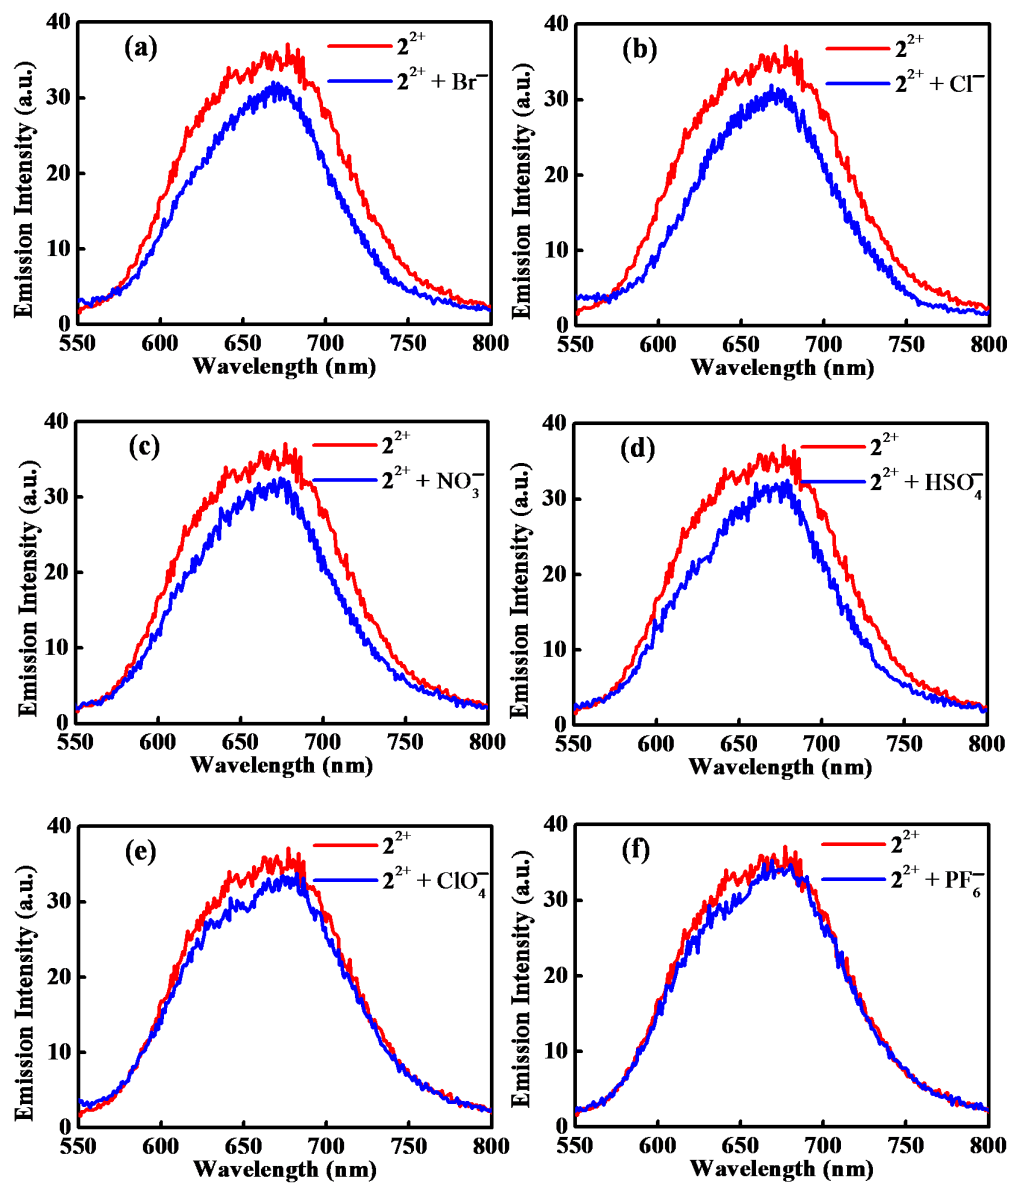

Fig. S21 Changes in emission spectra of receptor  $2^{2+}$  upon addition of different anions of TBA-salts.
